# Supplementary material for: Identifying human pre-mRNA cleavage and polyadenylation factors by genome-wide CRISPR screens using a dual fluorescence readthrough reporter
Source: PubMed Central journal article supplement (PMC11077057; doi:10.1093/nar/gkae240), 2024-04-08
Supplement: gkae240_supplemental_file.pdf [file gkae240_supplemental_file.pdf]

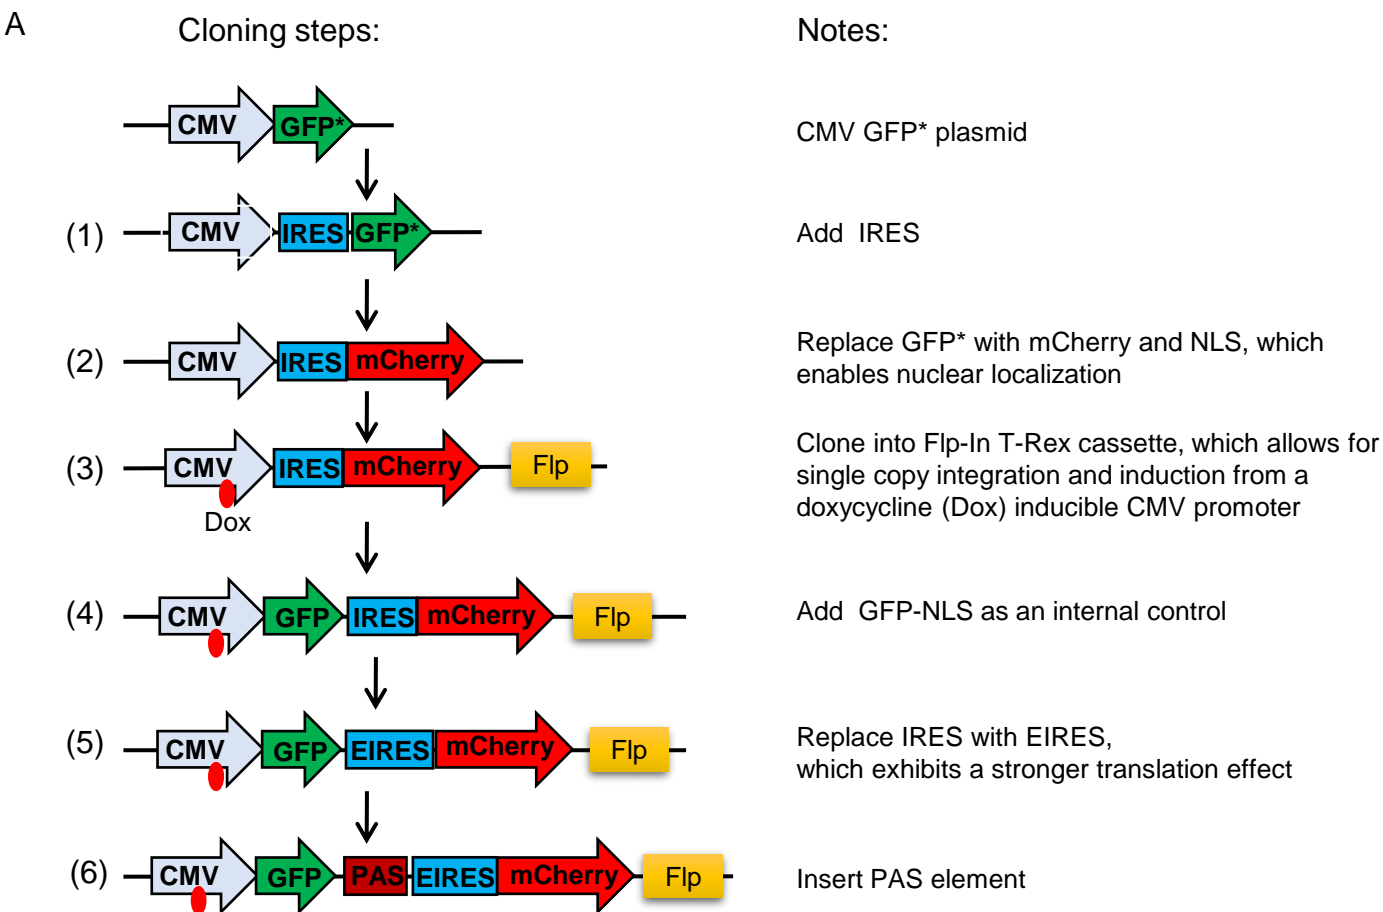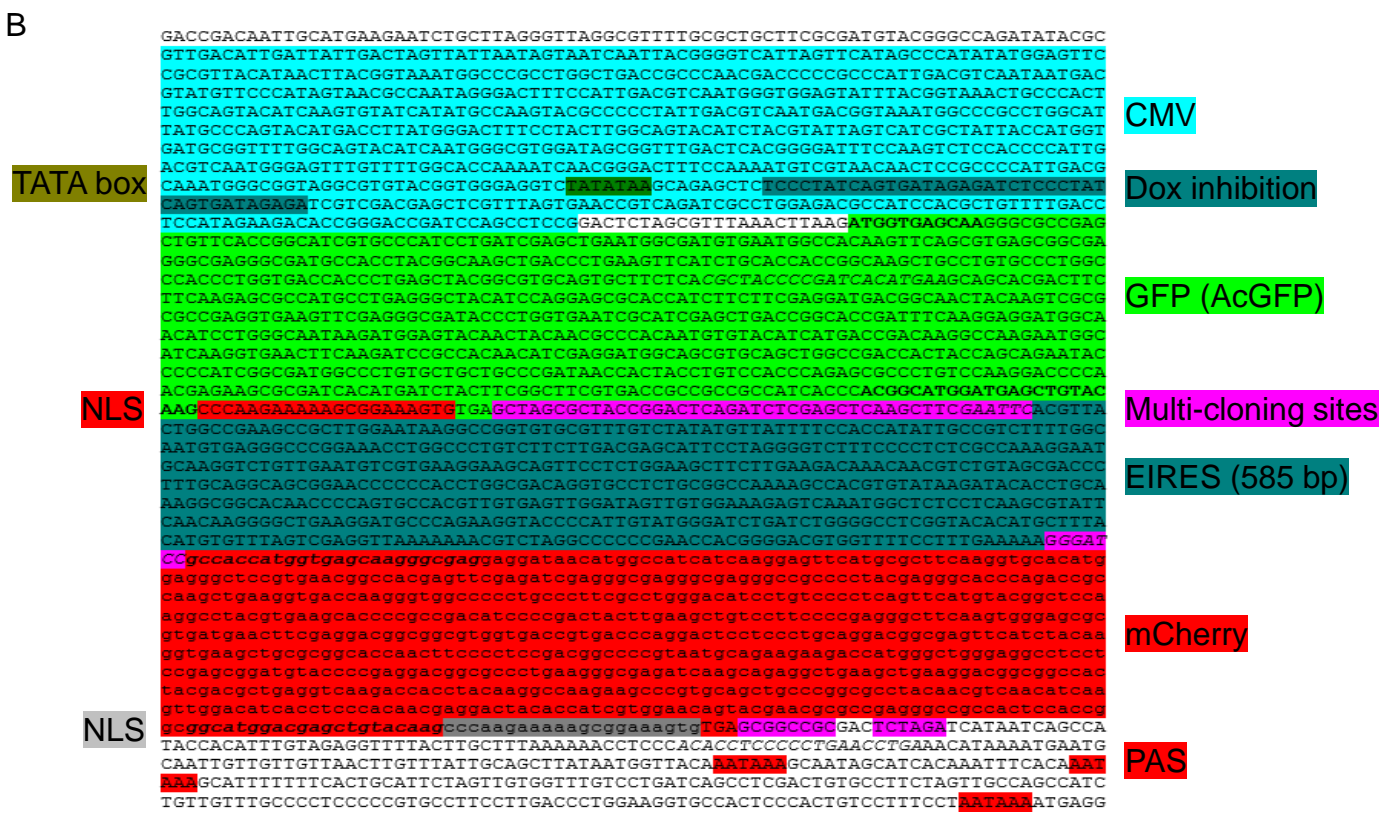

**Supplementary Figure S1.** Construction of a dual fluorescence readthrough reporter. **(A)** Cloning steps to construct a dual fluorescence readthrough reporter (see Methods for a detailed description). GFP\*: GFP without NLS (nuclear localization signal). **(B)** Sequences of the key features cloned into the dual fluorescence readthrough reporter.

**A**

```

IRES -----CACGTTACTGGCCGAAGCCGCTTGGGAATAAGGCCGGT
EIRES GCCCCTCTCCCTCCCCCCCCCTAACGTTACTGGCCGAAGCCGCTTGGGAATAAGGCCGGT
      .*****

IRES GTGCGTTTGTCTATATGTTATTTTCCACCATATTGCCGTCCTTTGGCAATGTGAGGGCCC
EIRES GTGCGTTTGTCTATATGTTATTTTCCACCATATTGCCGTCCTTTGGCAATGTGAGGGCCC
      *****

IRES GGAAACCTGGCCCTGTCTTCTTGACGAGCATTCTAGGGGTCTTCCCTCTCGCCAAAG
EIRES GGAAACCTGGCCCTGTCTTCTTGACGAGCATTCTAGGGGTCTTCCCTCTCGCCAAAG
      *****

IRES GAATGCAAGGTCTGTTGAATGTCGTGAAGGAAGCAGTTCCTCTGGAAGCTTCTTGAAGAC
EIRES GAATGCAAGGTCTGTTGAATGTCGTGAAGGAAGCAGTTCCTCTGGAAGCTTCTTGAAGAC
      *****

IRES AAACAACGTCTGTAGCGACCCTTTCAGGCAGCGGAACCCCCACCTGGCGACAGGTGCC
EIRES AAACAACGTCTGTAGCGACCCTTTCAGGCAGCGGAACCCCCACCTGGCGACAGGTGCC
      *****

IRES TCTGCGGCCAAAAGCCACGTGTATAAGATAACCTGCAAAGGCGGCACAACCCAGTGCC
EIRES TCTGCGGCCAAAAGCCACGTGTATAAGATAACCTGCAAAGGCGGCACAACCCAGTGCC
      *****

IRES ACGTTGTGAGTTGGATAGTTGTGGAAAGAGTCAAATGGCTCTCCTCAAGCGTATTCAACA
EIRES ACGTTGTGAGTTGGATAGTTGTGGAAAGAGTCAAATGGCTCTCCTCAAGCGTATTCAACA
      *****

IRES AGGGGCTGAAGGATGCCCAGAAGGTACCCCATTTGTATGGGATCTGATCTGGGGCCTCGGT
EIRES AGGGGCTGAAGGATGCCCAGAAGGTACCCCATTTGTATGGGATCTGATCTGGGGCCTCGGT
      *****

IRES ACACATGCTTTACATGTGTTTAGTCGAGGTTAAAAAACGTCTAGGCCCCCCGAACCACG
EIRES GCACATGCTTTACATGTGTTTAGTCGAGGTTAAAAAACGTCTAGGCCCCCCGAACCACG
      .*****

IRES GGGACGTGGTTTTTCTTTGAAAAA-----
EIRES GGGACGTGGTTTTTCTTTGAAAAACACGATGATAATATGGCCACA
      *****

```

**B**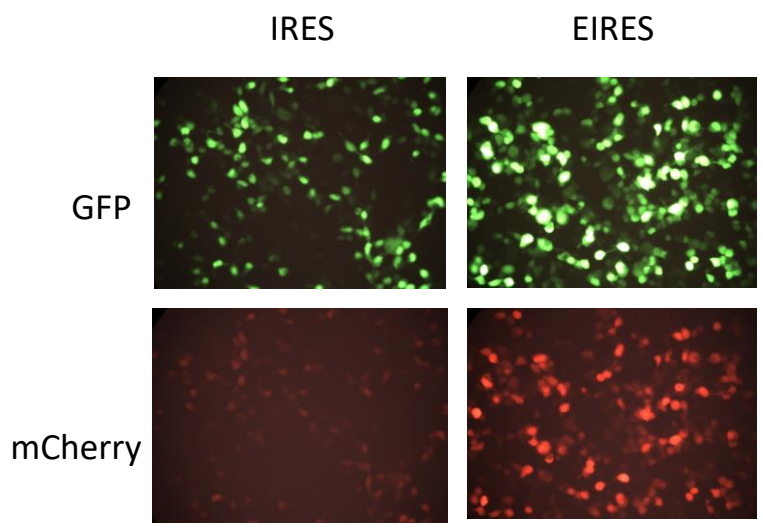

**Supplementary Figure S2.** Relative translation efficiencies mediated by the IRES and EIRES elements. **(A)** Sequence comparison between the IRES and EIRES elements. Alignment of the sequences between the IRES (540 bp) and EIRES (585 bp) elements that were derived from the pIGCN21 and MSCV-GPS-GAW plasmids, respectively. **(B)** IRES- and EIRES-mediated expression of mCherry. HEK293 cells were transfected with 500 ng of dual fluorescence readthrough reporter plasmids and induced with 1 µg/ml doxycycline for 24 hours. Images of the expressions of GFP and mCherry were captured by fluorescence microscopy.



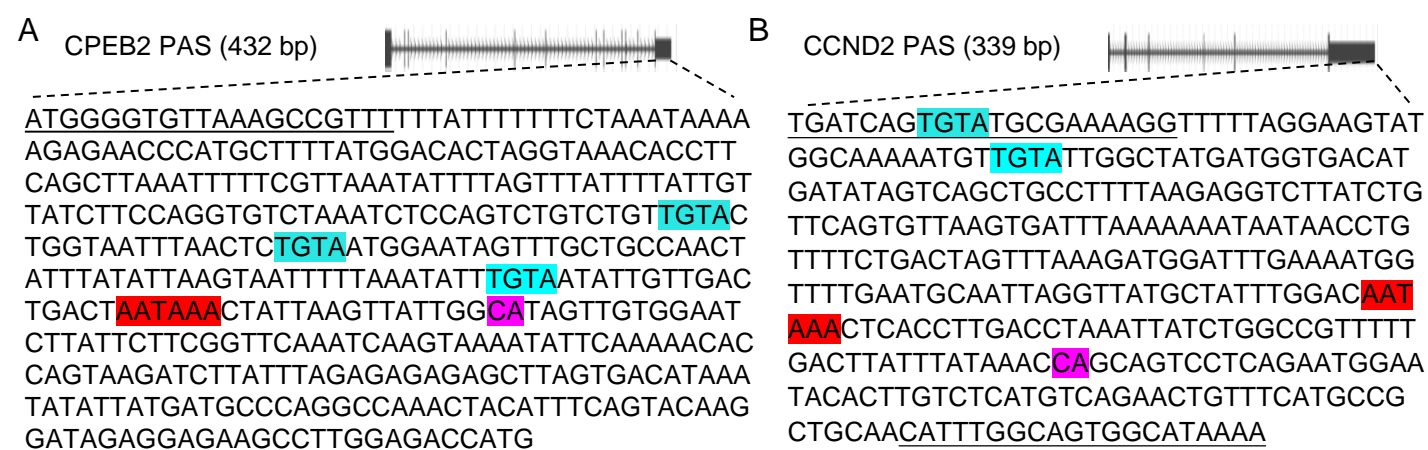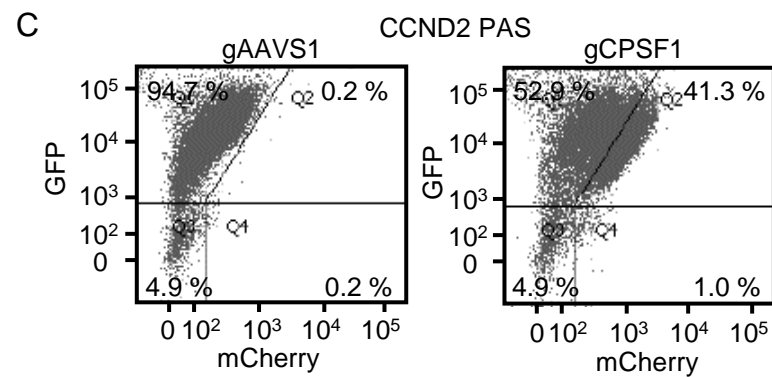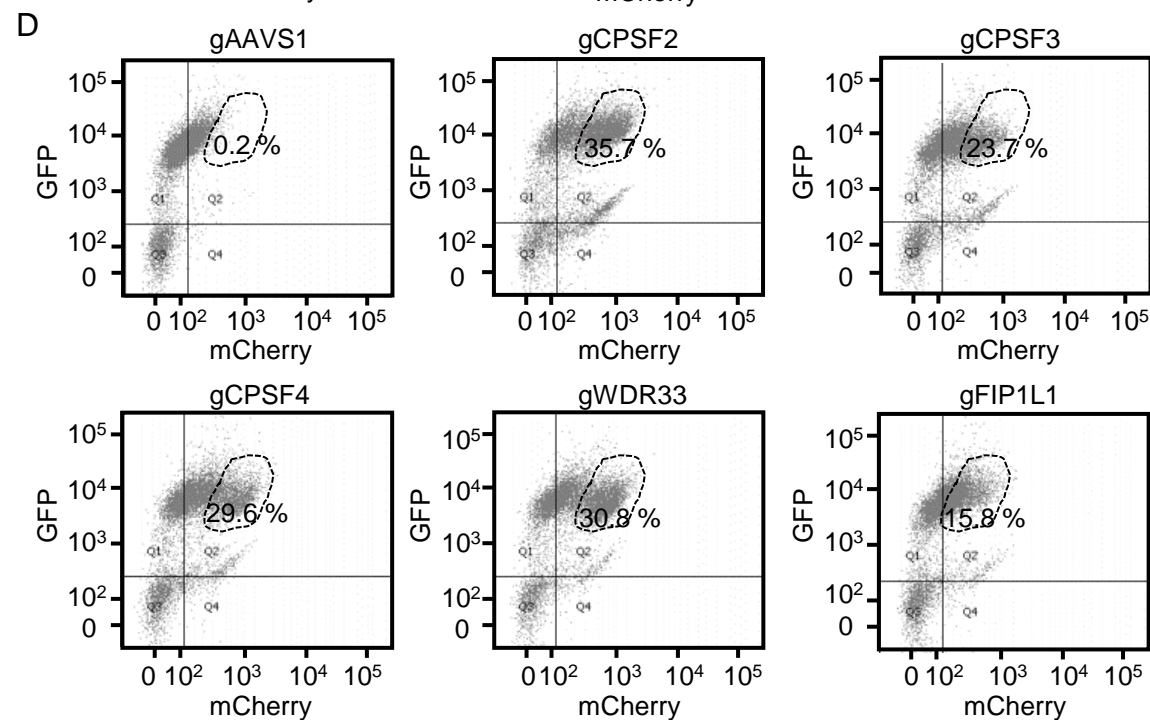

**Supplementary Figure S4.** PAS elements in the dual fluorescence readthrough reporters increased the mCherry/GFP ratio. (**A** and **B**) PAS DNA elements from the CPEB2 and CCND2 genes, respectively. Red: canonical PAS hexamer sequences. Blue: upstream UGUA sequences. Pink: cleavage sites. Underlined: cloning primer sequences. (**C**) Measurement of readthrough effects in the dual fluorescence readthrough reporter containing the distal PAS of the CCND2 gene. HEK293 cells with the integrated reporter were infected with lentiviruses transducing the indicated gRNAs for 7 days and induced with 1  $\mu$ g/ml of doxycycline for 4 days. (**D**) Measurement of readthrough effects as carried out in (**C**) in the dual fluorescence readthrough reporter containing the distal PAS of the CPEB2 gene. Circled: mCherry/GFP ratio increased cell population. In (**C**) and (**D**), 10,000 cells were analysed by FACS.

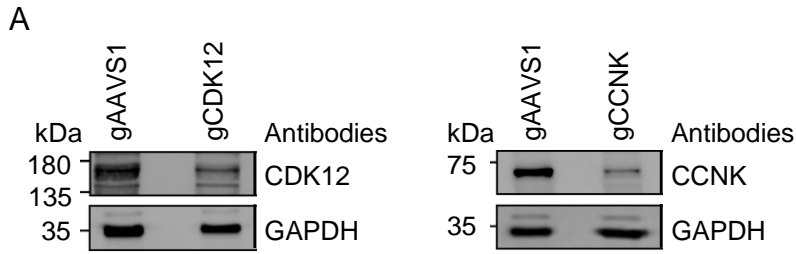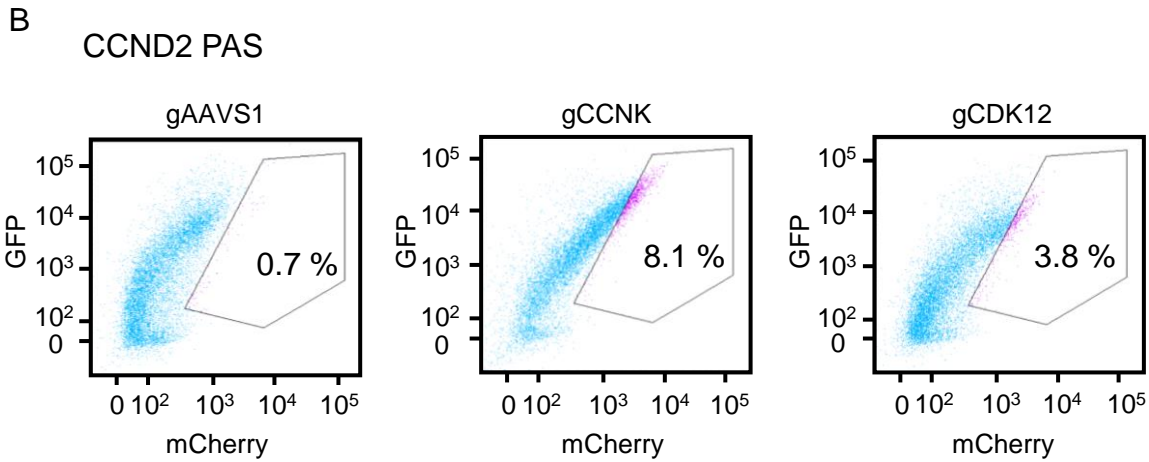

**Supplementary Figure S5.** Depletions of CDK12 and CCNK increased transcription readthrough effects. **(A)** Depletions of CDK12 and CCNK. Western blots were carried out using the indicated antibodies in lysates from HEK293 cells transduced with indicated lentiviral gRNAs. **(B)** CRISPR/Cas9-mediated depletion of CCNK or CDK12 increases the mCherry/GFP ratio in the dual fluorescence readthrough reporter containing the distal PAS from the CCND2 gene. 10,000 cells were analyzed by FACS. Cell populations with increased mCherry/GFP ratio are shown in pink color within the pentagon.

**Supplementary Table 1. The genes identified with the CPEB2 PAS (total of 174 genes)**

| Genes     | baseMean | log2FoldCh | lfcSE    | stat     | padj      |
|-----------|----------|------------|----------|----------|-----------|
| WDR33     | 5101.608 | 6.578032   | 0.239426 | 27.47414 | 6.24E-162 |
| CPSF1     | 5701.31  | 6.405913   | 0.292062 | 21.93343 | 1.09E-102 |
| CPSF4     | 6033.873 | 5.939491   | 0.274847 | 21.6102  | 8.38E-100 |
| CSTF1     | 2135.183 | 4.694103   | 0.502339 | 9.344489 | 2.27E-19  |
| CPSF2     | 1905.717 | 4.874861   | 0.648964 | 7.511762 | 1.37E-12  |
| SYMPK     | 1619.537 | 4.446872   | 0.68414  | 6.499944 | 1.52E-09  |
| CSTF3     | 1174.03  | 4.082038   | 0.66318  | 6.15525  | 1.02E-08  |
| NUDT21    | 1070.123 | 3.863408   | 0.661205 | 5.842982 | 4.87E-08  |
| FIP1L1    | 1718.348 | 4.183923   | 0.720885 | 5.803874 | 5.92E-08  |
| CPSF3     | 1630.35  | 4.618001   | 0.843944 | 5.471931 | 3.23E-07  |
| CCNK      | 726.4752 | 3.620481   | 0.834015 | 4.341025 | 7.11E-05  |
| CDK12     | 745.8451 | 3.520171   | 0.953812 | 3.690635 | 0.000815  |
| PPP1R10   | 71.77286 | 2.440611   | 0.880083 | 2.773161 | 0.015508  |
| VIRMA     | 547.5608 | 2.433479   | 0.962565 | 2.52812  | 0.029673  |
| PABPN1    | 384.7281 | 2.253236   | 0.936728 | 2.405434 | 0.040131  |
| BVES      | 500.643  | 1.91673    | 0.801801 | 2.39053  | 0.041608  |
| KRTAP13-3 | 588.5861 | 2.541136   | 1.063511 | 2.389383 | 0.041732  |
| HLA-DRA   | 561.9581 | 2.496774   | 1.06345  | 2.347806 | 0.046006  |
| SYNGR1    | 406.3496 | 2.791863   | 1.189801 | 2.346495 | 0.046155  |
| NKTR      | 548.5592 | 2.542559   | 1.088362 | 2.336134 | 0.047302  |
| DPCD      | 485.2428 | 2.014689   | 0.874235 | 2.304516 | 0.050809  |
| ANP32A    | 345.1412 | 2.447327   | 1.076897 | 2.272573 | 0.05461   |
| FGFBP3    | 370.1899 | 2.665863   | 1.206092 | 2.210332 | 0.062631  |
| NAPA      | 354.92   | 2.557472   | 1.164013 | 2.197117 | 0.062631  |
| CBLL1     | 448.739  | 2.193244   | 1.005831 | 2.180529 | 0.062631  |
| FBXL17    | 488.952  | 2.161633   | 0.998253 | 2.165416 | 0.062631  |
| OSGIN1    | 339.7591 | 2.369239   | 1.099804 | 2.154238 | 0.062631  |
| RBMS3     | 387.7365 | 2.278981   | 1.06991  | 2.130069 | 0.062631  |
| SRD5A3    | 339.5245 | 2.356479   | 1.129479 | 2.086342 | 0.062631  |
| NXPH2     | 452.1843 | 1.863129   | 0.896406 | 2.078442 | 0.062631  |
| LBP       | 407.9629 | 2.078652   | 1.000926 | 2.076729 | 0.062631  |
| GPR146    | 300.1503 | 2.218557   | 1.070898 | 2.071679 | 0.062631  |
| EXOSC4    | 300.6643 | 2.142375   | 1.047954 | 2.044341 | 0.062631  |
| ZSCAN4    | 351.5728 | 2.128478   | 1.061418 | 2.005316 | 0.062631  |
| DTWD2     | 427.9661 | 1.885489   | 0.940372 | 2.005047 | 0.062631  |
| PCF11     | 363.8059 | 2.100021   | 1.05265  | 1.994985 | 0.062631  |
| HJV       | 440.9107 | 2.372762   | 1.190597 | 1.992918 | 0.062631  |
| ITGAE     | 314.9118 | 2.379972   | 1.196884 | 1.988474 | 0.062631  |
| RPRD1B    | 355.5148 | 2.216194   | 1.124014 | 1.971678 | 0.062631  |
| MBNL3     | 440.6262 | 2.095993   | 1.072552 | 1.954211 | 0.062631  |
| FSCN1     | 392.2545 | 2.196129   | 1.126908 | 1.94881  | 0.062631  |
| HABP4     | 390.8338 | 2.291659   | 1.189889 | 1.925943 | 0.062631  |
| WDR82     | 429.7226 | 1.922858   | 1.002352 | 1.918347 | 0.062631  |
| FANCC     | 293.2937 | 2.138538   | 1.117613 | 1.913486 | 0.062631  |

|          |          |          |          |          |          |
|----------|----------|----------|----------|----------|----------|
| EDN1     | 331.0605 | 2.008361 | 1.05236  | 1.908436 | 0.062631 |
| TMEM56   | 516.1453 | 2.157732 | 1.131098 | 1.907644 | 0.062631 |
| NCF4     | 386.0168 | 2.029298 | 1.065388 | 1.904751 | 0.062631 |
| PPP1R15B | 270.8894 | 2.231783 | 1.172381 | 1.903634 | 0.062631 |
| VIM      | 347.9705 | 1.998801 | 1.050577 | 1.902574 | 0.062631 |
| OR14A2   | 459.6744 | 1.886042 | 0.997755 | 1.890285 | 0.062631 |
| PRPF4B   | 376.246  | 1.889978 | 1.000799 | 1.888469 | 0.062631 |
| IGF2BP2  | 434.0768 | 2.253065 | 1.197093 | 1.882113 | 0.062631 |
| BAZ2A    | 296.256  | 1.852996 | 0.985556 | 1.880153 | 0.062631 |
| UNC79    | 437.4266 | 2.117964 | 1.129542 | 1.875065 | 0.062631 |
| FANCF    | 378.8241 | 1.718658 | 0.926344 | 1.855313 | 0.062631 |
| TAFA1    | 324.648  | 1.547553 | 0.844676 | 1.832126 | 0.062631 |
| TOX4     | 421.5582 | 1.931249 | 1.055907 | 1.828996 | 0.062631 |
| MOB1B    | 329.0102 | 2.049502 | 1.123107 | 1.824851 | 0.062631 |
| CDH8     | 456.6944 | 2.069802 | 1.135096 | 1.82346  | 0.062631 |
| CHRNA7   | 355.1142 | 2.045665 | 1.122491 | 1.822433 | 0.062631 |
| FOXQ1    | 303.7676 | 1.741957 | 0.957686 | 1.818922 | 0.062631 |
| SAAL1    | 308.3925 | 1.924005 | 1.05963  | 1.815734 | 0.062631 |
| ATOH1    | 225.7602 | 1.894884 | 1.044394 | 1.814338 | 0.062631 |
| BOD1L1   | 366.3743 | 1.800256 | 0.994079 | 1.81098  | 0.062631 |
| RBPJL    | 359.6395 | 1.781765 | 0.985716 | 1.807584 | 0.062631 |
| INKA2    | 279.8792 | 1.98822  | 1.107778 | 1.794782 | 0.062631 |
| CCDC174  | 386.0888 | 1.662861 | 0.92784  | 1.792185 | 0.062631 |
| PPARG    | 444.0319 | 2.008636 | 1.124071 | 1.786931 | 0.062631 |
| RNF145   | 347.1702 | 1.798031 | 1.008485 | 1.782902 | 0.062631 |
| HERC1    | 413.2894 | 1.86487  | 1.057152 | 1.764051 | 0.062631 |
| SHARPIN  | 342.3627 | 1.528685 | 0.868366 | 1.760415 | 0.062631 |
| PPP1R36  | 322.0054 | 2.103399 | 1.195236 | 1.75982  | 0.062631 |
| TMEM170B | 249.6367 | 1.720677 | 0.978602 | 1.758301 | 0.062631 |
| HLA-DPB1 | 416.1282 | 1.901325 | 1.082188 | 1.756927 | 0.062631 |
| SERPINB2 | 352.1161 | 1.881458 | 1.071034 | 1.756675 | 0.062631 |
| PGAP3    | 313.6815 | 1.877154 | 1.069367 | 1.755388 | 0.062631 |
| VSNL1    | 296.2511 | 1.591824 | 0.913459 | 1.742633 | 0.062631 |
| PYCR3    | 335.3384 | 1.707269 | 0.984362 | 1.734391 | 0.062631 |
| OR5B2    | 354.1187 | 1.8357   | 1.062555 | 1.727628 | 0.062631 |
| TOP1MT   | 328.5202 | 1.806085 | 1.046998 | 1.725013 | 0.062631 |
| HPF1     | 345.1499 | 2.039655 | 1.183565 | 1.723314 | 0.062631 |
| TSPO     | 282.8269 | 1.556886 | 0.907012 | 1.716499 | 0.062631 |
| AMPD2    | 394.633  | 1.682729 | 0.982426 | 1.712829 | 0.062631 |
| DTL      | 328.2082 | 1.916246 | 1.122671 | 1.706864 | 0.062631 |
| BNIP3L   | 376.9582 | 1.921633 | 1.126341 | 1.706084 | 0.062631 |
| HTRA3    | 325.5239 | 1.768434 | 1.040687 | 1.699295 | 0.062631 |
| KRTAP6-2 | 479.048  | 1.807618 | 1.06389  | 1.699064 | 0.062631 |
| RCAN2    | 287.4809 | 1.881157 | 1.108201 | 1.697488 | 0.062631 |
| TACSTD2  | 336.8725 | 1.789701 | 1.055175 | 1.696118 | 0.062631 |
| MFSD2A   | 304.7119 | 1.776178 | 1.048231 | 1.694453 | 0.062631 |
| EMC1     | 317.235  | 1.559755 | 0.921262 | 1.693064 | 0.062631 |

|          |          |          |          |          |          |
|----------|----------|----------|----------|----------|----------|
| EPM2A    | 423.3813 | 1.713957 | 1.015835 | 1.68724  | 0.062631 |
| RHPN1    | 305.8497 | 1.885348 | 1.11769  | 1.686825 | 0.062631 |
| PHIP     | 383.1392 | 1.870306 | 1.109529 | 1.685675 | 0.062631 |
| PALB2    | 270.901  | 1.790606 | 1.065225 | 1.680966 | 0.062631 |
| CSF3R    | 395.2328 | 1.73425  | 1.035459 | 1.674862 | 0.062631 |
| KCTD21   | 324.7024 | 1.86056  | 1.114447 | 1.669492 | 0.062631 |
| CORO1B   | 411.045  | 1.89577  | 1.13636  | 1.668282 | 0.062631 |
| PNMA8B   | 275.2796 | 1.648298 | 0.988514 | 1.66745  | 0.062631 |
| ZNF169   | 312.1981 | 1.958589 | 1.175449 | 1.666248 | 0.062631 |
| CLIC6    | 236.1492 | 1.722824 | 1.035018 | 1.664535 | 0.062631 |
| UBXN4    | 313.4727 | 1.755147 | 1.054467 | 1.664488 | 0.062631 |
| METTL27  | 316.472  | 1.738003 | 1.050271 | 1.654814 | 0.062631 |
| FHL1     | 364.7983 | 1.747297 | 1.05687  | 1.653275 | 0.062631 |
| RBM25    | 305.7719 | 1.839776 | 1.117289 | 1.646642 | 0.062631 |
| SEMG2    | 345.1124 | 1.839396 | 1.122766 | 1.638272 | 0.062631 |
| CLEC3B   | 284.0622 | 1.936087 | 1.182279 | 1.637589 | 0.062631 |
| AXIN2    | 336.4897 | 1.824724 | 1.118241 | 1.631781 | 0.062631 |
| C17orf77 | 328.3373 | 1.729299 | 1.063735 | 1.625687 | 0.062631 |
| TNS4     | 322.2266 | 1.707471 | 1.050345 | 1.625629 | 0.062631 |
| CLOCK    | 266.5421 | 1.797093 | 1.105722 | 1.625266 | 0.062631 |
| ALDH1B1  | 333.0464 | 1.648472 | 1.017802 | 1.619639 | 0.062631 |
| GPN3     | 297.8909 | 1.798592 | 1.112511 | 1.616696 | 0.062631 |
| ARX      | 336.2044 | 1.805082 | 1.117151 | 1.615791 | 0.062631 |
| CACNA2D1 | 428.7119 | 1.841297 | 1.139598 | 1.615743 | 0.062631 |
| KIF23    | 392.6541 | 1.91292  | 1.186201 | 1.612644 | 0.062631 |
| AK7      | 259.7626 | 1.758159 | 1.095667 | 1.604647 | 0.062631 |
| GFM2     | 376.4818 | 1.88998  | 1.181239 | 1.599998 | 0.062631 |
| AGER     | 332.9367 | 1.900607 | 1.190273 | 1.596782 | 0.062631 |
| OR52B4   | 385.402  | 1.8861   | 1.182104 | 1.595545 | 0.062631 |
| GLE1     | 175.0869 | 1.612341 | 1.020543 | 1.579885 | 0.062631 |
| ZC3H3    | 163.4349 | 1.60943  | 1.020097 | 1.577722 | 0.062631 |
| HAUS5    | 246.4935 | 1.840257 | 1.171866 | 1.570365 | 0.062631 |
| SLX4IP   | 362.71   | 1.757377 | 1.119916 | 1.569203 | 0.062631 |
| MFSD3    | 306.6378 | 1.710073 | 1.09195  | 1.566073 | 0.062631 |
| EPHX1    | 323.1791 | 1.752616 | 1.119498 | 1.565537 | 0.062631 |
| TSKS     | 292.6927 | 1.636951 | 1.046185 | 1.564685 | 0.062631 |
| ZNF155   | 348.5514 | 1.577032 | 1.00991  | 1.561557 | 0.062631 |
| CPA6     | 285.7301 | 1.626205 | 1.042966 | 1.559213 | 0.062631 |
| OR1N2    | 309.1578 | 1.63908  | 1.052164 | 1.557819 | 0.062631 |
| YTHDC2   | 305.0416 | 1.592671 | 1.02289  | 1.557032 | 0.062631 |
| TECTB    | 335.3827 | 1.630267 | 1.050852 | 1.551376 | 0.062631 |
| PTP4A3   | 368.9406 | 1.43291  | 0.92373  | 1.55122  | 0.062631 |
| CTHRC1   | 339.4118 | 1.627874 | 1.050962 | 1.548937 | 0.062631 |
| MYO1F    | 420.4413 | 1.473835 | 0.952438 | 1.547435 | 0.062631 |
| WDR88    | 285.8206 | 1.716611 | 1.109647 | 1.546988 | 0.062631 |
| DOCK8    | 416.6321 | 1.640681 | 1.061784 | 1.545212 | 0.062631 |
| NOS2     | 336.7999 | 1.522994 | 0.986534 | 1.543783 | 0.062631 |



|          |          |          |          |          |          |
|----------|----------|----------|----------|----------|----------|
| CD69     | 354.8963 | 1.736851 | 1.125187 | 1.543611 | 0.062631 |
| PGK2     | 387.8707 | 1.471083 | 0.956036 | 1.538732 | 0.062631 |
| ARRDC1   | 256.8046 | 1.604544 | 1.048219 | 1.530733 | 0.062631 |
| BTBD2    | 239.5978 | 1.792034 | 1.1716   | 1.529561 | 0.062631 |
| GRK1     | 273.3689 | 1.702879 | 1.11836  | 1.522658 | 0.062631 |
| CNN3     | 296.5257 | 1.685987 | 1.108859 | 1.52047  | 0.062631 |
| ARPC1B   | 296.0864 | 1.784784 | 1.176861 | 1.516563 | 0.062631 |
| NODAL    | 311.3725 | 1.49107  | 0.983232 | 1.516498 | 0.062631 |
| TAS2R13  | 257.109  | 1.683134 | 1.110594 | 1.515526 | 0.062631 |
| PLEKHH3  | 281.106  | 1.581426 | 1.043668 | 1.515258 | 0.062631 |
| ZRANB1   | 246.0122 | 1.66697  | 1.100616 | 1.514579 | 0.062631 |
| HMBS     | 343.6544 | 1.479857 | 0.978409 | 1.512514 | 0.062631 |
| CD3E     | 310.8886 | 1.601822 | 1.05949  | 1.511881 | 0.062631 |
| RPL35    | 273.5818 | 1.574773 | 1.042436 | 1.510667 | 0.062631 |
| TXLNA    | 233.4886 | 1.474351 | 0.980506 | 1.503663 | 0.062631 |
| CLEC10A  | 320.591  | 1.675756 | 1.114618 | 1.503435 | 0.062631 |
| RGL4     | 310.8749 | 1.584015 | 1.056343 | 1.499527 | 0.062631 |
| ABCA12   | 340.5707 | 1.568768 | 1.046227 | 1.499453 | 0.062631 |
| ENDOD1   | 239.6129 | 1.424066 | 0.952306 | 1.495388 | 0.062631 |
| USP6NL   | 346.2885 | 1.65398  | 1.111392 | 1.488205 | 0.062631 |
| GATA5    | 324.2861 | 1.664708 | 1.120578 | 1.48558  | 0.062631 |
| SLC3A1   | 366.3297 | 1.677702 | 1.130039 | 1.484641 | 0.062631 |
| FGFR1OP2 | 277.4007 | 1.508025 | 1.016852 | 1.483033 | 0.062631 |
| COLQ     | 220.8047 | 1.633975 | 1.103487 | 1.480738 | 0.062631 |
| RNASEH2B | 325.0225 | 1.642727 | 1.10944  | 1.480681 | 0.062631 |
| CYP4F12  | 309.6315 | 1.552764 | 1.050481 | 1.478146 | 0.062631 |
| B3GNT7   | 249.3668 | 1.491763 | 1.010367 | 1.476456 | 0.062631 |
| LCA5     | 286.2288 | 1.729939 | 1.171902 | 1.476181 | 0.062631 |
| CETN2    | 324.7658 | 1.731127 | 1.172901 | 1.475936 | 0.062631 |
| NANS     | 279.58   | 1.656667 | 1.123242 | 1.474897 | 0.062631 |
| CHAT     | 246.1622 | 1.739487 | 1.181865 | 1.471816 | 0.062631 |
| CNPY1    | 359.5931 | 1.568611 | 1.066007 | 1.471483 | 0.062631 |
| CXCL10   | 382.3035 | 1.646284 | 1.121832 | 1.467496 | 0.062631 |
| OR5A1    | 327.0448 | 1.539923 | 1.050779 | 1.465505 | 0.062631 |
| DNAJA3   | 299.2959 | 1.610043 | 1.100246 | 1.463348 | 0.062631 |
| VTI1A    | 283.5253 | 1.725279 | 1.179752 | 1.462408 | 0.062631 |

padj < 0.05, 20 genes

padj < 0.25, but > 0.05, 154 genes

Well known core CPA factors, 11 genes

Documented CPA factors, 6 genes

Novel CPA factor characterized in this study, 1 gene

**Supplementary Table 2. The genes identified with the CCND2 PAS (total of 14 genes)**

| Genes  | baseMean | log2FoldChange | lfcSE    | stat     | padj     |
|--------|----------|----------------|----------|----------|----------|
| WDR33  | 1531.4   | 4.592135593    | 0.252545 | 18.18344 | 1.22E-69 |
| CPSF4  | 1684.397 | 3.868856136    | 0.292251 | 13.23811 | 4.61E-36 |
| CSTF3  | 927.9922 | 3.595344365    | 0.387647 | 9.274794 | 1.04E-16 |
| CPSF1  | 855.7871 | 3.456996648    | 0.388558 | 8.896994 | 2.50E-15 |
| CPSF2  | 973.2974 | 3.765772566    | 0.501631 | 7.507059 | 1.76E-10 |
| SYMPK  | 540.3713 | 2.373666132    | 0.420357 | 5.646791 | 3.57E-05 |
| CSTF1  | 574.4347 | 2.623584771    | 0.473731 | 5.538135 | 5.93E-05 |
| CDK12  | 559.1487 | 2.965308893    | 0.554916 | 5.34371  | 0.000159 |
| CCNK   | 603.2625 | 3.303751383    | 0.623411 | 5.299476 | 0.000161 |
| FIP1L1 | 958.2688 | 3.242461926    | 0.651084 | 4.9801   | 0.00076  |
| PCF11  | 462.9749 | 2.312962816    | 0.472223 | 4.898028 | 0.001056 |
| NUDT21 | 362.8481 | 2.029384517    | 0.442061 | 4.590738 | 0.004281 |
| CPSF3  | 472.2441 | 2.597259563    | 0.611559 | 4.246947 | 0.014542 |
| HNRNPU | 314.5592 | 1.676343085    | 0.484048 | 3.463177 | 0.127595 |

padj < 0.05, 13 genes

padj < 0.25, but > 0.05, 1 gene

Well known core CPA factors, 11 genes

Documented CPA factors, 2 genes
